# Supplementary material for: De novo assembly of plasmodium interspersed repeat (pir) genes from Plasmodium vivax RNAseq data suggests geographic conservation of sub-family transcription
Source: BMC Genomics. 2025 May 29;26:544. doi: 10.1186/s12864-025-11752-1 (PMC12121038; doi:10.1186/s12864-025-11752-1)
Supplement: Supplementary file 1 — Additional file 1. [file 12864_2025_11752_MOESM1_ESM.xlsx]

## Sheet: Assemblies
accession(s)	num_pir	num_transcripts	expt	BUSCO_Complete	BUSCO_Single	BUSCO_Duplicated	BUSCO_Fragmented	BUSCO_Missing	lifecycle_stage	location	experiment_id	helpful_assembly_name	sample_name	condition	isolate
SRX6923201_SRR10203284	18	5973	Rangel20	22.4	22.4	0	11.6	66	asexual_mixed	Acre_Brazil_SA	AsexBraz20	AsexJBC		Aim V_20	JBC
SRX6923204_SRR10203281									asexual_mixed	Acre_Brazil_SA	AsexBraz20	AsexJBC		McCoy's 5A_4	JBC
SRX6923205_SRR10203280									asexual_mixed	Acre_Brazil_SA	AsexBraz20	AsexJBC		McCoy's 5A_36	JBC
SRX6923212_SRR10203273									asexual_mixed	Acre_Brazil_SA	AsexBraz20	AsexJBC		Aim V_4	JBC
SRX6923213_SRR10203272									asexual_mixed	Acre_Brazil_SA	AsexBraz20	AsexJBC		DMEM_36	JBC
SRX6923219_SRR10203266									asexual_mixed	Acre_Brazil_SA	AsexBraz20	AsexJBC		IMDM_20	JBC
SRX6923231_SRR10203254									asexual_mixed	Acre_Brazil_SA	AsexBraz20	AsexJBC		Aim V_4	JBC
SRX6923232_SRR10203253									asexual_mixed	Acre_Brazil_SA	AsexBraz20	AsexJBC		DMEM_36	JBC
SRX6923237_SRR10203248									asexual_mixed	Acre_Brazil_SA	AsexBraz20	AsexJBC		IMDM_20	JBC
SRX6923252_SRR10203233									asexual_mixed	Acre_Brazil_SA	AsexBraz20	AsexJBC		McCoy's 5A_4	JBC
SRX6923253_SRR10203232									asexual_mixed	Acre_Brazil_SA	AsexBraz20	AsexJBC		McCoy's 5A_36	JBC
SRX6923254_SRR10203231									asexual_mixed	Acre_Brazil_SA	AsexBraz20	AsexJBC		DMEM_4	JBC
SRX6923255_SRR10203230									asexual_mixed	Acre_Brazil_SA	AsexBraz20	AsexJBC		DMEM_4	JBC
SRX6923269_SRR10203216									asexual_mixed	Acre_Brazil_SA	AsexBraz20	AsexJBC		McCoy's 5A_4	JBC
SRX6923270_SRR10203215									asexual_mixed	Acre_Brazil_SA	AsexBraz20	AsexJBC		IMDM_36	JBC
SRX6923271_SRR10203214									asexual_mixed	Acre_Brazil_SA	AsexBraz20	AsexJBC		DMEM_4	JBC
SRX6923278_SRR10203207									asexual_mixed	Acre_Brazil_SA	AsexBraz20	AsexJBC		DMEM_20	JBC
SRX6923289_SRR10203196									asexual_mixed	Acre_Brazil_SA	AsexBraz20	AsexJBC		IMDM_4	JBC
SRX6923290_SRR10203195									asexual_mixed	Acre_Brazil_SA	AsexBraz20	AsexJBC		IMDM_36	JBC
SRX6923291_SRR10203194									asexual_mixed	Acre_Brazil_SA	AsexBraz20	AsexJBC		Aim V_4	JBC
SRX6923298_SRR10203187									asexual_mixed	Acre_Brazil_SA	AsexBraz20	AsexJBC		DMEM_20	JBC
SRX6923308_SRR10203177									asexual_mixed	Acre_Brazil_SA	AsexBraz20	AsexJBC		IMDM_4	JBC
SRX6923309_SRR10203176									asexual_mixed	Acre_Brazil_SA	AsexBraz20	AsexJBC		Aim V_36	JBC
SRX6923314_SRR10203171									asexual_mixed	Acre_Brazil_SA	AsexBraz20	AsexJBC		McCoy's 5A_20	JBC
SRX6923317_SRR10203168									asexual_mixed	Acre_Brazil_SA	AsexBraz20	AsexJBC		Aim V_20	JBC
SRX6923326_SRR10203159									asexual_mixed	Acre_Brazil_SA	AsexBraz20	AsexJBC		IMDM_4	JBC
SRX6923327_SRR10203158									asexual_mixed	Acre_Brazil_SA	AsexBraz20	AsexJBC		Aim V_36	JBC
SRX6923333_SRR10203152	11	8624	Rangel20	40.7	40.7	0	17.4	41.9	asexual_mixed	Acre_Brazil_SA	AsexBraz20	AsexMRMS		McCoy's 5A_20	MRMS
SRX6923203_SRR10203282									asexual_mixed	Acre_Brazil_SA	AsexBraz20	AsexMRMS		McCoy's 5A_20	MRMS
SRX6923206_SRR10203279									asexual_mixed	Acre_Brazil_SA	AsexBraz20	AsexMRMS		McCoy's 5A_20	MRMS
SRX6923207_SRR10203278									asexual_mixed	Acre_Brazil_SA	AsexBraz20	AsexMRMS		Aim V_44 DNA low	MRMS
SRX6923214_SRR10203271									asexual_mixed	Acre_Brazil_SA	AsexBraz20	AsexMRMS		Aim V_4	MRMS
SRX6923215_SRR10203270									asexual_mixed	Acre_Brazil_SA	AsexBraz20	AsexMRMS		IMDM_36	MRMS
SRX6923220_SRR10203265									asexual_mixed	Acre_Brazil_SA	AsexBraz20	AsexMRMS		IMDM_44 DNA high	MRMS
SRX6923221_SRR10203264									asexual_mixed	Acre_Brazil_SA	AsexBraz20	AsexMRMS		DMEM_20	MRMS
SRX6923225_SRR10203260									asexual_mixed	Acre_Brazil_SA	AsexBraz20	AsexMRMS		McCoy's 5A_44 DNA low	MRMS
SRX6923233_SRR10203252									asexual_mixed	Acre_Brazil_SA	AsexBraz20	AsexMRMS		DMEM_4	MRMS
SRX6923234_SRR10203251									asexual_mixed	Acre_Brazil_SA	AsexBraz20	AsexMRMS		IMDM_36	MRMS
SRX6923240_SRR10203245									asexual_mixed	Acre_Brazil_SA	AsexBraz20	AsexMRMS		DMEM_20	MRMS
SRX6923244_SRR10203241									asexual_mixed	Acre_Brazil_SA	AsexBraz20	AsexMRMS		McCoy's 5A_44 DNA low	MRMS
SRX6923248_SRR10203237									asexual_mixed	Acre_Brazil_SA	AsexBraz20	AsexMRMS		IMDM_44 DNA low	MRMS
SRX6923256_SRR10203229									asexual_mixed	Acre_Brazil_SA	AsexBraz20	AsexMRMS		Aim V_36	MRMS
SRX6923257_SRR10203228									asexual_mixed	Acre_Brazil_SA	AsexBraz20	AsexMRMS		McCoy's 5A_4	MRMS
SRX6923260_SRR10203225									asexual_mixed	Acre_Brazil_SA	AsexBraz20	AsexMRMS		Aim V_44 DNA high	MRMS
SRX6923262_SRR10203223									asexual_mixed	Acre_Brazil_SA	AsexBraz20	AsexMRMS		Aim V_36	MRMS
SRX6923265_SRR10203220									asexual_mixed	Acre_Brazil_SA	AsexBraz20	AsexMRMS		IMDM_44 DNA low	MRMS
SRX6923272_SRR10203213									asexual_mixed	Acre_Brazil_SA	AsexBraz20	AsexMRMS		DMEM_36	MRMS
SRX6923273_SRR10203212									asexual_mixed	Acre_Brazil_SA	AsexBraz20	AsexMRMS		DMEM_4	MRMS
SRX6923274_SRR10203211									asexual_mixed	Acre_Brazil_SA	AsexBraz20	AsexMRMS		McCoy's 5A_4	MRMS
SRX6923277_SRR10203208									asexual_mixed	Acre_Brazil_SA	AsexBraz20	AsexMRMS		McCoy's 5A_44 DNA high	MRMS
SRX6923280_SRR10203205									asexual_mixed	Acre_Brazil_SA	AsexBraz20	AsexMRMS		IMDM_20	MRMS
SRX6923285_SRR10203200									asexual_mixed	Acre_Brazil_SA	AsexBraz20	AsexMRMS		IMDM_44 DNA low	MRMS
SRX6923292_SRR10203193									asexual_mixed	Acre_Brazil_SA	AsexBraz20	AsexMRMS		DMEM_36	MRMS
SRX6923293_SRR10203192									asexual_mixed	Acre_Brazil_SA	AsexBraz20	AsexMRMS		IMDM_4	MRMS
SRX6923297_SRR10203188									asexual_mixed	Acre_Brazil_SA	AsexBraz20	AsexMRMS		McCoy's 5A_44 DNA high	MRMS
SRX6923300_SRR10203185									asexual_mixed	Acre_Brazil_SA	AsexBraz20	AsexMRMS		IMDM_20	MRMS
SRX6923306_SRR10203179									asexual_mixed	Acre_Brazil_SA	AsexBraz20	AsexMRMS		Aim V_44 DNA high	MRMS
SRX6923310_SRR10203175									asexual_mixed	Acre_Brazil_SA	AsexBraz20	AsexMRMS		Aim V_4	MRMS
SRX6923311_SRR10203174									asexual_mixed	Acre_Brazil_SA	AsexBraz20	AsexMRMS		McCoy's 5A_36	MRMS
SRX6923315_SRR10203170									asexual_mixed	Acre_Brazil_SA	AsexBraz20	AsexMRMS		IMDM_44 DNA high	MRMS
SRX6923316_SRR10203169									asexual_mixed	Acre_Brazil_SA	AsexBraz20	AsexMRMS		Aim V_20	MRMS
SRX6923321_SRR10203164									asexual_mixed	Acre_Brazil_SA	AsexBraz20	AsexMRMS		Aim V_44 DNA low	MRMS
SRX6923329_SRR10203156									asexual_mixed	Acre_Brazil_SA	AsexBraz20	AsexMRMS		Aim V_4	MRMS
SRX6923330_SRR10203155									asexual_mixed	Acre_Brazil_SA	AsexBraz20	AsexMRMS		McCoy's 5A_36	MRMS
SRX6923334_SRR10203151									asexual_mixed	Acre_Brazil_SA	AsexBraz20	AsexMRMS		IMDM_44 DNA high	MRMS
SRX6923335_SRR10203150									asexual_mixed	Acre_Brazil_SA	AsexBraz20	AsexMRMS		Aim V_20	MRMS
SRX6923202_SRR10203283	15	10582	Rangel20	45.2	45.2	0	20	34.8	asexual_mixed	Acre_Brazil_SA	AsexBraz20	AsexTCF		IMDM_44 DNA high	TCF
SRX6923208_SRR10203277									asexual_mixed	Acre_Brazil_SA	AsexBraz20	AsexTCF		DMEM_72 DNA mid	TCF
SRX6923209_SRR10203276									asexual_mixed	Acre_Brazil_SA	AsexBraz20	AsexTCF		IMDM_44 DNA low	TCF
SRX6923210_SRR10203275									asexual_mixed	Acre_Brazil_SA	AsexBraz20	AsexTCF		Aim V_44 DNA low	TCF
SRX6923211_SRR10203274									asexual_mixed	Acre_Brazil_SA	AsexBraz20	AsexTCF		DMEM_72 DNA low	TCF
SRX6923216_SRR10203269									asexual_mixed	Acre_Brazil_SA	AsexBraz20	AsexTCF		McCoy's 5A_4	TCF
SRX6923217_SRR10203268									asexual_mixed	Acre_Brazil_SA	AsexBraz20	AsexTCF		Aim V_44 DNA high	TCF
SRX6923218_SRR10203267									asexual_mixed	Acre_Brazil_SA	AsexBraz20	AsexTCF		Aim V_36	TCF
SRX6923222_SRR10203263									asexual_mixed	Acre_Brazil_SA	AsexBraz20	AsexTCF		Aim V_44 DNA high	TCF
SRX6923223_SRR10203262									asexual_mixed	Acre_Brazil_SA	AsexBraz20	AsexTCF		McCoy's 5A_20	TCF
SRX6923224_SRR10203261									asexual_mixed	Acre_Brazil_SA	AsexBraz20	AsexTCF		McCoy's 5A_72 DNA mid	TCF
SRX6923226_SRR10203259									asexual_mixed	Acre_Brazil_SA	AsexBraz20	AsexTCF		DMEM_72 DNA mid	TCF
SRX6923227_SRR10203258									asexual_mixed	Acre_Brazil_SA	AsexBraz20	AsexTCF		McCoy's 5A_44 DNA low	TCF
SRX6923228_SRR10203257									asexual_mixed	Acre_Brazil_SA	AsexBraz20	AsexTCF		DMEM_20	TCF
SRX6923229_SRR10203256									asexual_mixed	Acre_Brazil_SA	AsexBraz20	AsexTCF		Aim V_44 DNA low	TCF
SRX6923230_SRR10203255									asexual_mixed	Acre_Brazil_SA	AsexBraz20	AsexTCF		IMDM_72 DNA mid	TCF
SRX6923235_SRR10203250									asexual_mixed	Acre_Brazil_SA	AsexBraz20	AsexTCF		McCoy's 5A_4	TCF
SRX6923236_SRR10203249									asexual_mixed	Acre_Brazil_SA	AsexBraz20	AsexTCF		Aim V_36	TCF
SRX6923238_SRR10203247									asexual_mixed	Acre_Brazil_SA	AsexBraz20	AsexTCF		IMDM_44 DNA high	TCF
SRX6923239_SRR10203246									asexual_mixed	Acre_Brazil_SA	AsexBraz20	AsexTCF		McCoy's 5A_72 DNA mid	TCF
SRX6923241_SRR10203244									asexual_mixed	Acre_Brazil_SA	AsexBraz20	AsexTCF		Aim V_44 DNA high	TCF
SRX6923242_SRR10203243									asexual_mixed	Acre_Brazil_SA	AsexBraz20	AsexTCF		McCoy's 5A_20	TCF
SRX6923243_SRR10203242									asexual_mixed	Acre_Brazil_SA	AsexBraz20	AsexTCF		McCoy's 5A_72 DNA mid	TCF
SRX6923245_SRR10203240									asexual_mixed	Acre_Brazil_SA	AsexBraz20	AsexTCF		Aim V_72 DNA mid	TCF
SRX6923246_SRR10203239									asexual_mixed	Acre_Brazil_SA	AsexBraz20	AsexTCF		McCoy's 5A_44 DNA low	TCF
SRX6923247_SRR10203238									asexual_mixed	Acre_Brazil_SA	AsexBraz20	AsexTCF		IMDM_72 DNA low	TCF
SRX6923249_SRR10203236									asexual_mixed	Acre_Brazil_SA	AsexBraz20	AsexTCF		Aim V_72 DNA mid	TCF
SRX6923250_SRR10203235									asexual_mixed	Acre_Brazil_SA	AsexBraz20	AsexTCF		McCoy's 5A_44 DNA low	TCF
SRX6923251_SRR10203234									asexual_mixed	Acre_Brazil_SA	AsexBraz20	AsexTCF		IMDM_72 DNA low	TCF
SRX6923258_SRR10203227									asexual_mixed	Acre_Brazil_SA	AsexBraz20	AsexTCF		IMDM_36	TCF
SRX6923259_SRR10203226									asexual_mixed	Acre_Brazil_SA	AsexBraz20	AsexTCF		DMEM_4	TCF
SRX6923261_SRR10203224									asexual_mixed	Acre_Brazil_SA	AsexBraz20	AsexTCF		IMDM_72 DNA mid	TCF
SRX6923263_SRR10203222									asexual_mixed	Acre_Brazil_SA	AsexBraz20	AsexTCF		DMEM_20	TCF
SRX6923264_SRR10203221									asexual_mixed	Acre_Brazil_SA	AsexBraz20	AsexTCF		McCoy's 5A_72 DNA high	TCF
SRX6923266_SRR10203219									asexual_mixed	Acre_Brazil_SA	AsexBraz20	AsexTCF		Aim V_72 DNA high	TCF
SRX6923267_SRR10203218									asexual_mixed	Acre_Brazil_SA	AsexBraz20	AsexTCF		DMEM_44 DNA low	TCF
SRX6923268_SRR10203217									asexual_mixed	Acre_Brazil_SA	AsexBraz20	AsexTCF		McCoy's 5A_72 DNA low	TCF
SRX6923275_SRR10203210									asexual_mixed	Acre_Brazil_SA	AsexBraz20	AsexTCF		McCoy's 5A_36	TCF
SRX6923276_SRR10203209									asexual_mixed	Acre_Brazil_SA	AsexBraz20	AsexTCF		Aim V_4	TCF
SRX6923279_SRR10203206									asexual_mixed	Acre_Brazil_SA	AsexBraz20	AsexTCF		McCoy's 5A_44 DNA high	TCF
SRX6923281_SRR10203204									asexual_mixed	Acre_Brazil_SA	AsexBraz20	AsexTCF		IMDM_72 DNA mid	TCF
SRX6923282_SRR10203203									asexual_mixed	Acre_Brazil_SA	AsexBraz20	AsexTCF		Aim V_20	TCF
SRX6923283_SRR10203202									asexual_mixed	Acre_Brazil_SA	AsexBraz20	AsexTCF		McCoy's 5A_72 DNA high	TCF
SRX6923284_SRR10203201									asexual_mixed	Acre_Brazil_SA	AsexBraz20	AsexTCF		IMDM_36	TCF
SRX6923286_SRR10203199									asexual_mixed	Acre_Brazil_SA	AsexBraz20	AsexTCF		Aim V_72 DNA high	TCF
SRX6923287_SRR10203198									asexual_mixed	Acre_Brazil_SA	AsexBraz20	AsexTCF		DMEM_44 DNA low	TCF
SRX6923288_SRR10203197									asexual_mixed	Acre_Brazil_SA	AsexBraz20	AsexTCF		McCoy's 5A_72 DNA low	TCF
SRX6923294_SRR10203191									asexual_mixed	Acre_Brazil_SA	AsexBraz20	AsexTCF		McCoy's 5A_36	TCF
SRX6923295_SRR10203190									asexual_mixed	Acre_Brazil_SA	AsexBraz20	AsexTCF		DMEM_4	TCF
SRX6923296_SRR10203189									asexual_mixed	Acre_Brazil_SA	AsexBraz20	AsexTCF		Aim V_4	TCF
SRX6923299_SRR10203186									asexual_mixed	Acre_Brazil_SA	AsexBraz20	AsexTCF		McCoy's 5A_44 DNA high	TCF
SRX6923301_SRR10203184									asexual_mixed	Acre_Brazil_SA	AsexBraz20	AsexTCF		IMDM_72 DNA high	TCF
SRX6923302_SRR10203183									asexual_mixed	Acre_Brazil_SA	AsexBraz20	AsexTCF		Aim V_20	TCF
SRX6923303_SRR10203182									asexual_mixed	Acre_Brazil_SA	AsexBraz20	AsexTCF		McCoy's 5A_72 DNA high	TCF
SRX6923304_SRR10203181									asexual_mixed	Acre_Brazil_SA	AsexBraz20	AsexTCF		IMDM_44 DNA low	TCF
SRX6923305_SRR10203180									asexual_mixed	Acre_Brazil_SA	AsexBraz20	AsexTCF		DMEM_44 DNA low	TCF
SRX6923307_SRR10203178									asexual_mixed	Acre_Brazil_SA	AsexBraz20	AsexTCF		McCoy's 5A_72 DNA low	TCF
SRX6923312_SRR10203173									asexual_mixed	Acre_Brazil_SA	AsexBraz20	AsexTCF		IMDM_4	TCF
SRX6923313_SRR10203172									asexual_mixed	Acre_Brazil_SA	AsexBraz20	AsexTCF		DMEM_36	TCF
SRX6923318_SRR10203167									asexual_mixed	Acre_Brazil_SA	AsexBraz20	AsexTCF		McCoy's 5A_44 DNA high	TCF
SRX6923319_SRR10203166									asexual_mixed	Acre_Brazil_SA	AsexBraz20	AsexTCF		IMDM_20	TCF
SRX6923320_SRR10203165									asexual_mixed	Acre_Brazil_SA	AsexBraz20	AsexTCF		IMDM_72 DNA high	TCF
SRX6923322_SRR10203163									asexual_mixed	Acre_Brazil_SA	AsexBraz20	AsexTCF		DMEM_72 DNA mid	TCF
SRX6923323_SRR10203162									asexual_mixed	Acre_Brazil_SA	AsexBraz20	AsexTCF		IMDM_44 DNA low	TCF
SRX6923324_SRR10203161									asexual_mixed	Acre_Brazil_SA	AsexBraz20	AsexTCF		Aim V_44 DNA low	TCF
SRX6923325_SRR10203160									asexual_mixed	Acre_Brazil_SA	AsexBraz20	AsexTCF		DMEM_72 DNA low	TCF
SRX6923328_SRR10203157									asexual_mixed	Acre_Brazil_SA	AsexBraz20	AsexTCF		IMDM_44 DNA high	TCF
SRX6923331_SRR10203154									asexual_mixed	Acre_Brazil_SA	AsexBraz20	AsexTCF		IMDM_4	TCF
SRX6923332_SRR10203153									asexual_mixed	Acre_Brazil_SA	AsexBraz20	AsexTCF		DMEM_36	TCF
SRX6923336_SRR10203149									asexual_mixed	Acre_Brazil_SA	AsexBraz20	AsexTCF		DMEM_44 DNA high	TCF
SRX6923337_SRR10203148									asexual_mixed	Acre_Brazil_SA	AsexBraz20	AsexTCF		IMDM_20	TCF
SRX6923338_SRR10203147									asexual_mixed	Acre_Brazil_SA	AsexBraz20	AsexTCF		IMDM_72 DNA high	TCF
ERX3566949_ERR3568550	0	1872	Bourgard21	1.6	1.5	0.1	0.4	98	asexual_trophozoite	Manaus_Brazil_SA	AsexBraz21	S10	S10		93U15
ERX3566952_ERR3568553	2	7783	Bourgard21	26.7	24	2.7	8.1	65.2	asexual_trophozoite	Manaus_Brazil_SA	AsexBraz21	S14	S14		62U15
ERX3566946_ERR3568547	1	6784	Bourgard21	24	21.9	2.1	9	67	asexual_trophozoite	Manaus_Brazil_SA	AsexBraz21	S17	S17		66U15.2
ERX3566947_ERR3568548	0	1768	Bourgard21	1.7	1.5	0.2	0.9	97.4	asexual_trophozoite	Manaus_Brazil_SA	AsexBraz21	S6	S6		101U15
ERX3566948_ERR3568549	0	6019	Bourgard21	1.9	1.4	0.5	0.3	97.8	asexual_trophozoite	Manaus_Brazil_SA	AsexBraz21	S7	S7		93U15
ERX3566950_ERR3568551	0	12902	Bourgard21	7.8	6.1	1.7	2.6	89.6	asexual_trophozoite	Manaus_Brazil_SA	AsexBraz21	S8	S8		101U15
ERX3566951_ERR3568552	0	4187	Bourgard21	4.3	3.7	0.6	1.7	94	asexual_trophozoite	Manaus_Brazil_SA	AsexBraz21	S9	S9		101U15
SRX5259275_SRR8452526	180	34530	Gunalan19	72.5	60.1	12.4	7.3	20.2	asexual_mixed	Unk_ElSalv_CA	AsexSal119	Asex	Aotus_1	Aotus_1	Sal1
SRX5259276_SRR8452527									asexual_mixed	Unk_ElSalv_CA	AsexSal119	Asex	Aotus_2	Aotus_2	Sal1
SRX5259277_SRR8452528									asexual_mixed	Unk_ElSalv_CA	AsexSal119	Asex	Saimiri_1	Saimiri_1	Sal1
SRX5259278_SRR8452529									asexual_mixed	Unk_ElSalv_CA	AsexSal119	Asex	Saimiri_2	Saimiri_2	Sal1
SRX697827_SRR1571697	157	12840	Zhu16	75.4	64.4	11	6.6	18	asexual_mixed	MaeSot_Thailand_SEA	AsexThai16	Asex1	SMRU1	P.vivax_smru1_RNAseq_6hr	SMRU1
SRX697828_SRR1571698			Zhu16						asexual_mixed	MaeSot_Thailand_SEA	AsexThai16	Asex1	SMRU1	P.vivax_smru1_RNAseq_18hr	SMRU1
SRX697829_SRR1571699			Zhu16						asexual_mixed	MaeSot_Thailand_SEA	AsexThai16	Asex1	SMRU1	P.vivax_smru1_RNAseq_24hr	SMRU1
SRX697830_SRR1571700			Zhu16						asexual_mixed	MaeSot_Thailand_SEA	AsexThai16	Asex1	SMRU1	P.vivax_smru1_RNAseq_30hr	SMRU1
SRX697831_SRR1571701			Zhu16						asexual_mixed	MaeSot_Thailand_SEA	AsexThai16	Asex1	SMRU1	P.vivax_smru1_RNAseq_36hr	SMRU1
SRX697832_SRR1571702			Zhu16						asexual_mixed	MaeSot_Thailand_SEA	AsexThai16	Asex1	SMRU1	P.vivax_smru1_RNAseq_42hr	SMRU1
SRX697833_SRR1571703			Zhu16						asexual_mixed	MaeSot_Thailand_SEA	AsexThai16	Asex1	SMRU1	P.vivax_smru1_RNAseq_48hr	SMRU1
SRX697834_SRR1571704	290	13949	Zhu16	74.1	62.4	11.7	6.4	19.5	asexual_mixed	MaeSot_Thailand_SEA	AsexThai16	Asex2	SMRU2	P.vivax_smru2_RNAseq_6hr	SMRU2
SRX697835_SRR1571705			Zhu16						asexual_mixed	MaeSot_Thailand_SEA	AsexThai16	Asex2	SMRU2	P.vivax_smru2_RNAseq_12hr	SMRU2
SRX697836_SRR1571706			Zhu16						asexual_mixed	MaeSot_Thailand_SEA	AsexThai16	Asex2	SMRU2	P.vivax_smru2_RNAseq_18hr	SMRU2
SRX697837_SRR1571707			Zhu16						asexual_mixed	MaeSot_Thailand_SEA	AsexThai16	Asex2	SMRU2	P.vivax_smru2_RNAseq_24hr	SMRU2
SRX697838_SRR1571708			Zhu16						asexual_mixed	MaeSot_Thailand_SEA	AsexThai16	Asex2	SMRU2	P.vivax_smru2_RNAseq_30hr	SMRU2
SRX697839_SRR1571709			Zhu16						asexual_mixed	MaeSot_Thailand_SEA	AsexThai16	Asex2	SMRU2	P.vivax_smru2_RNAseq_36hr	SMRU2
SRX697840_SRR1571710			Zhu16						asexual_mixed	MaeSot_Thailand_SEA	AsexThai16	Asex2	SMRU2	P.vivax_smru2_RNAseq_42hr	SMRU2
SRX697841_SRR1571711			Zhu16						asexual_mixed	MaeSot_Thailand_SEA	AsexThai16	Asex2	SMRU2	P.vivax_smru2_RNAseq_48hr	SMRU2
SRX697842_SRR1571712	366	28433	Zhu16	88.4	45.9	42.5	5.2	6.4	asexual_mixed	MaeSot_Thailand_SEA	AsexThai16	AsexMix	Mixed	P.vivax_normalized_RNAseq_1	Mixed
SRX697843_SRR1571713			Zhu16						asexual_mixed	MaeSot_Thailand_SEA	AsexThai16	AsexMix	Mixed	P.vivax_normalized_RNAseq_2	Mixed
SRX697844_SRR1571714			Zhu16						asexual_mixed	MaeSot_Thailand_SEA	AsexThai16	AsexMix	Mixed	P.vivax_normalized_RNAseq_3	Mixed
SRX697845_SRR1571715			Zhu16						asexual_mixed	MaeSot_Thailand_SEA	AsexThai16	AsexMix	Mixed	P.vivax_normalized_RNAseq_4	Mixed
ERX2560129-ERR2541711	29	20993	Cheng19	21.8	20	1.8	13.2	65	asexual_mixed	Unk_Thailand_SEA	AsexThai19	Asex1	Asex1		Asex1
ERX2560134-ERR2541716	0	16005	Cheng19	10.3	9.2	1.1	10.4	79.3	asexual_mixed	Unk_Thailand_SEA	AsexThai19	Asex10	Asex10		Asex10
ERX2560130-ERR2541712	15	22168	Cheng19	15.2	14.3	0.9	10.9	73.9	asexual_mixed	Unk_Thailand_SEA	AsexThai19	Asex2	Asex2		Asex2
ERX2560131-ERR2541713	11	21316	Cheng19	16.4	15.4	1	10.4	73.2	asexual_mixed	Unk_Thailand_SEA	AsexThai19	Asex3	Asex3		Asex3
ERX2560127-ERR2541709	5	19492	Cheng19	21.9	20.5	1.4	13.7	64.4	asexual_mixed	Unk_Thailand_SEA	AsexThai19	Asex4	Asex4		Asex4
ERX2560128-ERR2541710	2	21206	Cheng19	11.3	9.2	2.1	10.8	77.9	asexual_mixed	Unk_Thailand_SEA	AsexThai19	Asex5	Asex5		Asex5
ERX2560133-ERR2541715	2	15504	Cheng19	8.1	7.7	0.4	6.2	85.7	asexual_mixed	Unk_Thailand_SEA	AsexThai19	Asex6	Asex6		Asex6
ERX2560125-ERR2541707	0	6911	Cheng19	0.8	0.7	0.1	0.7	98.5	asexual_mixed	Unk_Thailand_SEA	AsexThai19	Asex7	Asex7		Asex7
ERX2560126-ERR2541708	0	13419	Cheng19	4.5	3.8	0.7	4.9	90.6	asexual_mixed	Unk_Thailand_SEA	AsexThai19	Asex8	Asex8		Asex8
ERX2560132-ERR2541714	0	5121	Cheng19	0.9	0.8	0.1	0.7	98.4	asexual_mixed	Unk_Thailand_SEA	AsexThai19	Asex9	Asex9		Asex9
SRX3467117-SRR6371896	0	110	Gural18	0.1	0.1	0	0.2	99.7	liver_hypnozoite	Unk_Thailand_SEA	LivrThai18	Hyp1	Hyp1		Hyp1
SRX3467220-SRR6371897	0	176	Gural18	0.1	0.1	0	0.1	99.8	liver_hypnozoite	Unk_Thailand_SEA	LivrThai18	Hyp2	Hyp2		Hyp2
SRX3467115-SRR6371894	0	4140	Gural18	6.1	5.8	0.3	4.9	89	liver_mixed	Unk_Thailand_SEA	LivrThai18	Lvr1	Lvr1		Lvr1
SRX3467116-SRR6371895	0	5163	Gural18	6.3	6.1	0.2	5.8	87.9	liver_mixed	Unk_Thailand_SEA	LivrThai18	Lvr2	Lvr2		Lvr2
SRX2884278-SRR5646669	172	15150	Kim17	64.2	55.6	8.6	11.6	24.2	asexual_mixed	Unk_Cambodia_SEA	MixdCamb17	Asex1	Asex1		Asex1
SRX2884277-SRR5646670	160	15341	Kim17	65.8	56.4	9.4	12.2	22	asexual_mixed	Unk_Cambodia_SEA	MixdCamb17	Asex2	Asex2		Asex2
SRX2884276-SRR5646671	90	16773	Kim17	47.4	39.7	7.7	11.6	41	asexual_mixed	Unk_Cambodia_SEA	MixdCamb17	Asex3	Asex3		Asex3
SRX5158495-SRR8347532	60	5562	Kim17	16.7	13.8	2.9	3.8	79.5	asexual_mixed	Unk_Cambodia_SEA	MixdCamb17	Asex4	Asex4		Asex4
SRX5158517-SRR8347510	18	4678	Kim17	11.7	9.6	2.1	3.2	85.1	asexual_mixed	Unk_Cambodia_SEA	MixdCamb17	Asex5	Asex5		Asex5
SRX5158494-SRR8347533	1	503	Kim17	2.1	1.8	0.3	0	97.9	asexual_mixed	Unk_Cambodia_SEA	MixdCamb17	Asex6	Asex6		Asex6
SRX2884279-SRR5646668	0	12490	Kim17	6.1	5.1	1	3.8	90.1	mosquito_sporozoite	Unk_Cambodia_SEA	MixdCamb17	Spz	Spz		Spz
SRX5158512_SRR8347515	9	3167	Kim19	9.9	8.8	1.1	3.3	86.8	asexual_mixed	Unk_Cambodia_SEA	MixdCamb19	Asex1	A	CQ-before	A
SRX5158513_SRR8347514			Kim19						asexual_mixed	Unk_Cambodia_SEA	MixdCamb19	Asex1	A	CQ-after	A
SRX5158525_SRR8347502	240	19115	Kim19	67.9	51.9	16	10.8	21.3	asexual_mixed	Unk_Cambodia_SEA	MixdCamb19	Asex10	J	CQ-before	J
SRX5158526_SRR8347501			Kim19						asexual_mixed	Unk_Cambodia_SEA	MixdCamb19	Asex10	J	CQ-after	J
SRX5158500_SRR8347527	125	14317	Kim19	62.4	51.3	11.1	10.3	27.3	asexual_mixed	Unk_Cambodia_SEA	MixdCamb19	Asex11	K	CQ-after	K
SRX5158501_SRR8347526			Kim19						asexual_mixed	Unk_Cambodia_SEA	MixdCamb19	Asex11	K	CQ-before	K
SRX5158498_SRR8347529	158	15806	Kim19	57.9	48.2	9.7	11.2	30.9	asexual_mixed	Unk_Cambodia_SEA	MixdCamb19	Asex12	L	CQ-after	L
SRX5158499_SRR8347528			Kim19						asexual_mixed	Unk_Cambodia_SEA	MixdCamb19	Asex12	L	CQ-before	L
SRX5158504_SRR8347523	0	172	Kim19	0.5	0.4	0.1	0.1	99.4	asexual_mixed	Unk_Cambodia_SEA	MixdCamb19	Asex13	M	CQ-after	M
SRX5158505_SRR8347522			Kim19						asexual_mixed	Unk_Cambodia_SEA	MixdCamb19	Asex13	M	CQ-before	M
SRX5158502_SRR8347525	14	3228	Kim19	10.5	8.8	1.7	3.5	86	asexual_mixed	Unk_Cambodia_SEA	MixdCamb19	Asex14	N	CQ-after	N
SRX5158503_SRR8347524			Kim19						asexual_mixed	Unk_Cambodia_SEA	MixdCamb19	Asex14	N	CQ-before	N
SRX5158496_SRR8347531	21	6794	Kim19	26.1	22.8	3.3	7.5	66.4	asexual_mixed	Unk_Cambodia_SEA	MixdCamb19	Asex15	O	CQ-after	O
SRX5158497_SRR8347530			Kim19						asexual_mixed	Unk_Cambodia_SEA	MixdCamb19	Asex15	O	CQ-before	O
SRX5158523_SRR8347504	125	13885	Kim19	59.7	47.3	12.4	10.2	30.1	asexual_mixed	Unk_Cambodia_SEA	MixdCamb19	Asex16	P	CQ-before	P
SRX5158524_SRR8347503			Kim19						asexual_mixed	Unk_Cambodia_SEA	MixdCamb19	Asex16	P	CQ-after	P
SRX5158509_SRR8347518	26	7079	Kim19	25.7	22.4	3.3	7.2	67.1	asexual_mixed	Unk_Cambodia_SEA	MixdCamb19	Asex17	Q	CQ-before	Q
SRX5158518_SRR8347509			Kim19						asexual_mixed	Unk_Cambodia_SEA	MixdCamb19	Asex17	Q	CQ-after	Q
SRX5158519_SRR8347508	3	1923	Kim19	8.2	7.3	0.9	1.8	90	asexual_mixed	Unk_Cambodia_SEA	MixdCamb19	Asex18	S	CQ-before	S
SRX5158520_SRR8347507			Kim19						asexual_mixed	Unk_Cambodia_SEA	MixdCamb19	Asex18	S	CQ-after	S
SRX5158521_SRR8347506	18	4616	Kim19	12.8	10.3	2.5	4.3	82.9	asexual_mixed	Unk_Cambodia_SEA	MixdCamb19	Asex19	T	CQ-before	T
SRX5158522_SRR8347505			Kim19						asexual_mixed	Unk_Cambodia_SEA	MixdCamb19	Asex19	T	CQ-after	T
SRX5158514_SRR8347513	62	15363	Kim19	60.6	47.7	12.9	12.3	27.1	asexual_mixed	Unk_Cambodia_SEA	MixdCamb19	Asex2	B	CQ-before	B
SRX5158515_SRR8347512			Kim19						asexual_mixed	Unk_Cambodia_SEA	MixdCamb19	Asex2	B	CQ-after	B
SRX5158492_SRR8347535	109	14029	Kim19	52.7	43	9.7	10.4	36.9	asexual_mixed	Unk_Cambodia_SEA	MixdCamb19	Asex20	U	CQ-before	U
SRX5158493_SRR8347534			Kim19						asexual_mixed	Unk_Cambodia_SEA	MixdCamb19	Asex20	U	CQ-after	U
SRX5158508_SRR8347519	216	14260	Kim19	76.4	64.4	12	9.6	14	asexual_mixed	Unk_Cambodia_SEA	MixdCamb19	Asex3	C	CQ-before	C
SRX5158516_SRR8347511			Kim19						asexual_mixed	Unk_Cambodia_SEA	MixdCamb19	Asex3	C	CQ-after	C
SRX5158510_SRR8347517	168	14440	Kim19	67.1	56.9	10.2	10.5	22.4	asexual_mixed	Unk_Cambodia_SEA	MixdCamb19	Asex4	D	CQ-before	D
SRX5158511_SRR8347516			Kim19						asexual_mixed	Unk_Cambodia_SEA	MixdCamb19	Asex4	D	CQ-after	D
SRX5158506_SRR8347521	27	3474	Kim19	10.8	9.2	1.6	3	86.2	asexual_mixed	Unk_Cambodia_SEA	MixdCamb19	Asex5	E	CQ-before	E
SRX5158507_SRR8347520			Kim19						asexual_mixed	Unk_Cambodia_SEA	MixdCamb19	Asex5	E	CQ-after	E
SRX5158533_SRR8347494	169	17604	Kim19	76	57.8	18.2	9.8	14.2	asexual_mixed	Unk_Cambodia_SEA	MixdCamb19	Asex6	F	CQ-before	F
SRX5158534_SRR8347493			Kim19						asexual_mixed	Unk_Cambodia_SEA	MixdCamb19	Asex6	F	CQ-after	F
SRX5158531_SRR8347496	79	19311	Kim19	54.1	43.6	10.5	12.5	33.4	asexual_mixed	Unk_Cambodia_SEA	MixdCamb19	Asex7	G	CQ-before	G
SRX5158532_SRR8347495			Kim19						asexual_mixed	Unk_Cambodia_SEA	MixdCamb19	Asex7	G	CQ-after	G
SRX5158529_SRR8347498	0	2325	Kim19	8.4	7.1	1.3	2.4	89.2	asexual_mixed	Unk_Cambodia_SEA	MixdCamb19	Asex8	H	CQ-before	H
SRX5158530_SRR8347497			Kim19						asexual_mixed	Unk_Cambodia_SEA	MixdCamb19	Asex8	H	CQ-after	H
SRX5158527_SRR8347500	8	1397	Kim19	4.6	4.2	0.4	1	94.4	asexual_mixed	Unk_Cambodia_SEA	MixdCamb19	Asex9	I	CQ-before	I
SRX5158528_SRR8347499			Kim19						asexual_mixed	Unk_Cambodia_SEA	MixdCamb19	Asex9	I	CQ-after	I
	62	96677	Imp22	74.1	52.9	21.2	12.9	13	mosquito_mixed	Iquitos_Peru_SA	MosqPeru23	Mosq1	Mosq1		Mosq1
	60	89762	Imp22	71.6	62.6	9	13.1	15.3	mosquito_mixed	Iquitos_Peru_SA	MosqPeru23	Mosq2	Mosq2		Mosq2
	18	81692	Imp22	54.4	48.3	6.1	16.9	28.7	mosquito_mixed	Iquitos_Peru_SA	MosqPeru23	Mosq3	Mosq3		Mosq3
SRX6838396-SRR10106504	0	22870	Boonkaew20	2.5	1.5	1	0.7	96.8	mosquito_oocyst	Yala_Thailand_SEA	MosqThai20	Ooc1	Ooc1		Ooc1
SRX6838397-SRR10106503	0	17474	Boonkaew20	2	1.4	0.6	0.6	97.4	mosquito_oocyst	Songkhla_Thailand_SEA	MosqThai20	Ooc2	Ooc2		Ooc2
SRX6875288-SRR10149833	0	26588	Boonkaew20	1.7	1	0.7	0.3	98	mosquito_ookinete	Yala_Thailand_SEA	MosqThai20	Ook1	Ook1		Ook1
SRX6875287-SRR10149834	0	44127	Boonkaew20	2.7	1.3	1.4	0.3	97	mosquito_ookinete	Songkhla_Thailand_SEA	MosqThai20	Ook2	Ook2		Ook2
ERX1787318_ERR1717084	321	19206	Siegal20	71.5	55.5	16	10.8	17.7	asexual_schizont	Unk_Cambodia_SEA	SchzMixd20	Sch	Sch		Sch
ERX1787319_ERR1717085									asexual_schizont	Unk_Cambodia_SEA	SchzMixd20	Sch	Sch		Sch
ERX1787320_ERR1717086									asexual_schizont	Unk_Cambodia_SEA	SchzMixd20	Sch	Sch		Sch
ERX1787321_ERR1717087									asexual_schizont	Unk_Cambodia_SEA	SchzMixd20	Sch	Sch		Sch
SRX15926192_SRR19882885	222	15024	Meul22	69.9	56.2	13.7	7.7	22.4	asexual_schizont	Iquitos_Peru_SA	SchzMixd22	Sch1			Pv004
SRX15926191_SRR19882886									asexual_schizont	Iquitos_Peru_SA	SchzMixd22	Sch1			Pv004
SRX15926206_SRR19882871	39	22439	Meul22	51	33.1	17.9	17.7	31.3	asexual_schizont	Iquitos_Peru_SA	SchzMixd22	Sch10			Pv030
SRX15926205_SRR19882872									asexual_schizont	Iquitos_Peru_SA	SchzMixd22	Sch10			Pv030
SRX15926209_SRR19882868	166	20175	Meul22	70.9	54.1	16.8	12.3	16.8	asexual_schizont	Iquitos_Peru_SA	SchzMixd22	Sch11			Pv032
SRX15926208_SRR19882869									asexual_schizont	Iquitos_Peru_SA	SchzMixd22	Sch11			Pv032
SRX15926207_SRR19882870									asexual_schizont	Iquitos_Peru_SA	SchzMixd22	Sch11			Pv032
SRX15926212_SRR19882865	260	13627	Meul22	64.1	53.5	10.6	11.4	24.5	asexual_schizont	Iquitos_Peru_SA	SchzMixd22	Sch12			Pv033
SRX15926211_SRR19882866									asexual_schizont	Iquitos_Peru_SA	SchzMixd22	Sch12			Pv033
SRX15926210_SRR19882867									asexual_schizont	Iquitos_Peru_SA	SchzMixd22	Sch12			Pv033
SRX15926213_SRR19882864	155	13282	Meul22	67	54.4	12.6	9.2	23.8	asexual_schizont	Iquitos_Peru_SA	SchzMixd22	Sch13			Pv041
SRX15926215_SRR19882862									asexual_schizont	Iquitos_Peru_SA	SchzMixd22	Sch13			Pv041
SRX15926216_SRR19882861	17	2446	Meul22	5.3	4.6	0.7	1.1	93.6	asexual_schizont	Madang_PNG_SEA	SchzMixd22	Sch14			T036
SRX15926217_SRR19882860	0	1274	Meul22	4.8	4.4	0.4	1	94.2	asexual_schizont	Madang_PNG_SEA	SchzMixd22	Sch15			T054
SRX15926218_SRR19882859	373	9957	Meul22	25.9	23.8	2.1	6.8	67.3	asexual_schizont	Madang_PNG_SEA	SchzMixd22	Sch16			T056
SRX15926203_SRR19882874	20	19443	Meul22	39	24.5	14.5	17	44	asexual_schizont	Iquitos_Peru_SA	SchzMixd22	Sch2			Pv030
SRX15926220_SRR19882857	254	13079	Meul22	64.1	54.4	9.7	10.8	25.1	asexual_schizont	Iquitos_Peru_SA	SchzMixd22	Sch3			Pv017
SRX15926219_SRR19882858									asexual_schizont	Iquitos_Peru_SA	SchzMixd22	Sch3			Pv017
SRX15926214_SRR19882863									asexual_schizont	Iquitos_Peru_SA	SchzMixd22	Sch3			Pv017
SRX15926223_SRR19882854	287	29878	Meul22	85.9	49.7	36.2	7.2	6.9	asexual_schizont	Iquitos_Peru_SA	SchzMixd22	Sch4			Pv020
SRX15926222_SRR19882855									asexual_schizont	Iquitos_Peru_SA	SchzMixd22	Sch4			Pv020
SRX15926221_SRR19882856									asexual_schizont	Iquitos_Peru_SA	SchzMixd22	Sch4			Pv020
SRX15926224_SRR19882853	144	21988	Meul22	84.6	54.9	29.7	7.9	7.5	asexual_schizont	Iquitos_Peru_SA	SchzMixd22	Sch5			Pv021
SRX15926193_SRR19882884									asexual_schizont	Iquitos_Peru_SA	SchzMixd22	Sch5			Pv021
SRX15926195_SRR19882882	409	27332	Meul22	89.6	49.6	40	4.5	5.9	asexual_schizont	Iquitos_Peru_SA	SchzMixd22	Sch6			Pv022
SRX15926194_SRR19882883									asexual_schizont	Iquitos_Peru_SA	SchzMixd22	Sch6			Pv022
SRX15926197_SRR19882880	236	12241	Meul22	71.7	60.5	11.2	6.9	21.4	asexual_schizont	Iquitos_Peru_SA	SchzMixd22	Sch7			Pv023
SRX15926196_SRR19882881									asexual_schizont	Iquitos_Peru_SA	SchzMixd22	Sch7			Pv023
SRX15926199_SRR19882878	206	13378	Meul22	73.3	63.1	10.2	9.9	16.8	asexual_schizont	Iquitos_Peru_SA	SchzMixd22	Sch8			Pv024
SRX15926198_SRR19882879									asexual_schizont	Iquitos_Peru_SA	SchzMixd22	Sch8			Pv024
SRX15926201_SRR19882876	86	22904	Meul22	67.6	45.5	22.1	14.3	18.1	asexual_schizont	Iquitos_Peru_SA	SchzMixd22	Sch9			Pv025
SRX15926200_SRR19882877									asexual_schizont	Iquitos_Peru_SA	SchzMixd22	Sch9			Pv025
SRX15926202_SRR19882875									asexual_schizont	Iquitos_Peru_SA	SchzMixd22	Sch9			Pv025
SRX15926204_SRR19882873									asexual_schizont	Iquitos_Peru_SA	SchzMixd22	Sch9			Pv025
SRX4420275-SRR7554416	0	3947	Roth18	2.9	2.7	0.2	3.7	93.4	mosquito_sporozoite	MyanmarBorder_Thailand_SEA	SpztThai18	Spz1			Spz1
SRX4420284-SRR7554425	0	4783	Roth18	7.4	6.8	0.6	6	86.6	mosquito_sporozoite	MyanmarBorder_Thailand_SEA	SpztThai18	Spz10			Spz10
SRX4420285-SRR7554426	0	8887	Roth18	14.5	13	1.5	8.9	76.6	mosquito_sporozoite	MyanmarBorder_Thailand_SEA	SpztThai18	Spz11			Spz11
SRX4420286-SRR7554427	0	9305	Roth18	21.9	19.6	2.3	10.7	67.4	mosquito_sporozoite	MyanmarBorder_Thailand_SEA	SpztThai18	Spz12			Spz12
SRX4420287-SRR7554428	0	2965	Roth18	1.5	1.4	0.1	2	96.5	mosquito_sporozoite	MyanmarBorder_Thailand_SEA	SpztThai18	Spz13			Spz13
SRX4420288-SRR7554429	0	2226	Roth18	1.5	1.3	0.2	2.1	96.4	mosquito_sporozoite	MyanmarBorder_Thailand_SEA	SpztThai18	Spz14			Spz14
SRX4420289-SRR7554430	0	4137	Roth18	5.6	5	0.6	5	89.4	mosquito_sporozoite	MyanmarBorder_Thailand_SEA	SpztThai18	Spz15			Spz15
SRX4420290-SRR7554431	0	3321	Roth18	3.3	3	0.3	3.9	92.8	mosquito_sporozoite	MyanmarBorder_Thailand_SEA	SpztThai18	Spz16			Spz16
SRX4420291-SRR7554432	0	3420	Roth18	3.8	3.6	0.2	3.8	92.4	mosquito_sporozoite	MyanmarBorder_Thailand_SEA	SpztThai18	Spz17			Spz17
SRX4420292-SRR7554433	0	3030	Roth18	2.5	2.4	0.1	3.1	94.4	mosquito_sporozoite	MyanmarBorder_Thailand_SEA	SpztThai18	Spz18			Spz18
SRX4420293-SRR7554434	0	5757	Roth18	6.2	4.9	1.3	4.8	89	mosquito_sporozoite	MyanmarBorder_Thailand_SEA	SpztThai18	Spz19			Spz19
SRX4420276-SRR7554417	0	2643	Roth18	2.6	2.5	0.1	3	94.4	mosquito_sporozoite	MyanmarBorder_Thailand_SEA	SpztThai18	Spz2			Spz2
SRX4420294-SRR7554435	0	7131	Roth18	16.8	15.2	1.6	9.1	74.1	mosquito_sporozoite	MyanmarBorder_Thailand_SEA	SpztThai18	Spz20			Spz20
SRX4420295-SRR7554436	0	7441	Roth18	6.1	4.8	1.3	4.7	89.2	mosquito_sporozoite	MyanmarBorder_Thailand_SEA	SpztThai18	Spz21			Spz21
SRX4420296-SRR7554437	0	4344	Roth18	6.4	6.2	0.2	5.5	88.1	mosquito_sporozoite	MyanmarBorder_Thailand_SEA	SpztThai18	Spz22			Spz22
SRX4420297-SRR7554438	0	4462	Roth18	2.5	2.3	0.2	2.7	94.8	mosquito_sporozoite	MyanmarBorder_Thailand_SEA	SpztThai18	Spz23			Spz23
SRX4420298-SRR7554439	0	5265	Roth18	7.3	6	1.3	6.1	86.6	mosquito_sporozoite	MyanmarBorder_Thailand_SEA	SpztThai18	Spz24			Spz24
SRX4420299-SRR7554440	0	4475	Roth18	7.4	6.9	0.5	5.6	87	mosquito_sporozoite	MyanmarBorder_Thailand_SEA	SpztThai18	Spz25			Spz25
SRX4420300-SRR7554441	0	6130	Roth18	13.4	12.2	1.2	8.1	78.5	mosquito_sporozoite	MyanmarBorder_Thailand_SEA	SpztThai18	Spz26			Spz26
SRX4420301-SRR7554442	0	4396	Roth18	7.5	6.9	0.6	5.5	87	mosquito_sporozoite	MyanmarBorder_Thailand_SEA	SpztThai18	Spz27			Spz27
SRX4420302-SRR7554443	0	5772	Roth18	12.3	11	1.3	8.1	79.6	mosquito_sporozoite	MyanmarBorder_Thailand_SEA	SpztThai18	Spz28			Spz28
SRX4420303-SRR7554444	0	3741	Roth18	5.2	4.8	0.4	4.6	90.2	mosquito_sporozoite	MyanmarBorder_Thailand_SEA	SpztThai18	Spz29			Spz29
SRX4420277-SRR7554418	0	3523	Roth18	3.4	2.9	0.5	3.4	93.2	mosquito_sporozoite	MyanmarBorder_Thailand_SEA	SpztThai18	Spz3			Spz3
SRX4420304-SRR7554445	0	6851	Roth18	13.4	12.2	1.2	8.3	78.3	mosquito_sporozoite	MyanmarBorder_Thailand_SEA	SpztThai18	Spz30			Spz30
SRX4420305-SRR7554446	0	3872	Roth18	5.2	4.6	0.6	4.3	90.5	mosquito_sporozoite	MyanmarBorder_Thailand_SEA	SpztThai18	Spz31			Spz31
SRX4420306-SRR7554447	0	6263	Roth18	10.8	8.6	2.2	7.6	81.6	mosquito_sporozoite	MyanmarBorder_Thailand_SEA	SpztThai18	Spz32			Spz32
SRX4420307-SRR7554448	0	4802	Roth18	4.5	3.8	0.7	3.9	91.6	mosquito_sporozoite	MyanmarBorder_Thailand_SEA	SpztThai18	Spz33			Spz33
SRX4420308-SRR7554449	0	3452	Roth18	6.7	6	0.7	4.6	88.7	mosquito_sporozoite	MyanmarBorder_Thailand_SEA	SpztThai18	Spz34			Spz34
SRX4420309-SRR7554450	0	3785	Roth18	4.5	3.6	0.9	4.1	91.4	mosquito_sporozoite	MyanmarBorder_Thailand_SEA	SpztThai18	Spz35			Spz35
SRX4420310-SRR7554451	0	4616	Roth18	8	7.3	0.7	6	86	mosquito_sporozoite	MyanmarBorder_Thailand_SEA	SpztThai18	Spz36			Spz36
SRX4420311-SRR7554452	0	3108	Roth18	5.3	4.9	0.4	4.3	90.4	mosquito_sporozoite	MyanmarBorder_Thailand_SEA	SpztThai18	Spz37			Spz37
SRX4420312-SRR7554453	0	2886	Roth18	3.9	3.5	0.4	3.9	92.2	mosquito_sporozoite	MyanmarBorder_Thailand_SEA	SpztThai18	Spz38			Spz38
SRX4420313-SRR7554454	0	3200	Roth18	5.7	5	0.7	4.1	90.2	mosquito_sporozoite	MyanmarBorder_Thailand_SEA	SpztThai18	Spz39			Spz39
SRX4420278-SRR7554419	0	4838	Roth18	4.2	3.4	0.8	4.8	91	mosquito_sporozoite	MyanmarBorder_Thailand_SEA	SpztThai18	Spz4			Spz4
SRX4420314-SRR7554455	0	5109	Roth18	9.6	8.3	1.3	7.7	82.7	mosquito_sporozoite	MyanmarBorder_Thailand_SEA	SpztThai18	Spz40			Spz40
SRX4420315-SRR7554456	0	2060	Roth18	4.3	4	0.3	3.1	92.6	mosquito_sporozoite	MyanmarBorder_Thailand_SEA	SpztThai18	Spz41			Spz41
SRX4420316-SRR7554457	0	1662	Roth18	2.5	2.3	0.2	2.6	94.9	mosquito_sporozoite	MyanmarBorder_Thailand_SEA	SpztThai18	Spz42			Spz42
SRX4420317-SRR7554458	0	2099	Roth18	2.8	2.6	0.2	3.6	93.6	mosquito_sporozoite	MyanmarBorder_Thailand_SEA	SpztThai18	Spz43			Spz43
SRX4420318-SRR7554459	0	6878	Roth18	13.8	11.8	2	9.6	76.6	mosquito_sporozoite	MyanmarBorder_Thailand_SEA	SpztThai18	Spz44			Spz44
SRX4420319-SRR7554460	0	10985	Roth18	24.5	21.9	2.6	11.6	63.9	mosquito_sporozoite	MyanmarBorder_Thailand_SEA	SpztThai18	Spz45			Spz45
SRX4420320-SRR7554461	0	11805	Roth18	22.2	18.1	4.1	9.5	68.3	mosquito_sporozoite	MyanmarBorder_Thailand_SEA	SpztThai18	Spz46			Spz46
SRX4420321-SRR7554462	0	9184	Roth18	19.2	17.5	1.7	10.5	70.3	mosquito_sporozoite	MyanmarBorder_Thailand_SEA	SpztThai18	Spz47			Spz47
SRX4420322-SRR7554463	0	9637	Roth18	19.1	17.4	1.7	11.7	69.2	mosquito_sporozoite	MyanmarBorder_Thailand_SEA	SpztThai18	Spz48			Spz48
SRX4420323-SRR7554464	0	13614	Roth18	0.9	0.8	0.1	0.3	98.8	mosquito_sporozoite	MyanmarBorder_Thailand_SEA	SpztThai18	Spz49			Spz49
SRX4420279-SRR7554420	0	3961	Roth18	3.4	3	0.4	3.7	92.9	mosquito_sporozoite	MyanmarBorder_Thailand_SEA	SpztThai18	Spz5			Spz5
SRX4420324-SRR7554465	0	14318	Roth18	1	0.5	0.5	0.2	98.8	mosquito_sporozoite	MyanmarBorder_Thailand_SEA	SpztThai18	Spz50			Spz50
SRX4420325-SRR7554466	0	12917	Roth18	1	0.8	0.2	0.3	98.7	mosquito_sporozoite	MyanmarBorder_Thailand_SEA	SpztThai18	Spz51			Spz51
SRX4420326-SRR7554467	0	1105	Roth18	0.1	0.1	0	0	99.9	mosquito_sporozoite	MyanmarBorder_Thailand_SEA	SpztThai18	Spz52			Spz52
SRX4420280-SRR7554421	0	4224	Roth18	4.9	4.1	0.8	4.5	90.6	mosquito_sporozoite	MyanmarBorder_Thailand_SEA	SpztThai18	Spz6			Spz6
SRX4420281-SRR7554422	0	3026	Roth18	2.3	2.3	0	2.9	94.8	mosquito_sporozoite	MyanmarBorder_Thailand_SEA	SpztThai18	Spz7			Spz7
SRX4420282-SRR7554423	0	4501	Roth18	5.3	4.4	0.9	5.4	89.3	mosquito_sporozoite	MyanmarBorder_Thailand_SEA	SpztThai18	Spz8			Spz8
SRX4420283-SRR7554424	0	4106	Roth18	3.7	3.5	0.2	4.1	92.2	mosquito_sporozoite	MyanmarBorder_Thailand_SEA	SpztThai18	Spz9			Spz9
SRX2600377_SRR5298190	1	12086	Muller19	37.4	31.4	6	13.5	49.1	mosquito_sporozoite	Tak-Ubon_Thailand_SEA	SpztThai19	Spz1			Spz1
SRX2600371_SRR5298184	0	15302	Muller19	27.8	21.5	6.3	13.3	58.9	mosquito_sporozoite	Tak-Ubon_Thailand_SEA	SpztThai19	Spz2			Spz2
SRX2600372_SRR5298185									mosquito_sporozoite	Tak-Ubon_Thailand_SEA	SpztThai19	Spz2			Spz2
SRX2600369_SRR5298182	0	14685	Muller19	33.6	27	6.6	15.8	50.6	mosquito_sporozoite	Tak-Ubon_Thailand_SEA	SpztThai19	Spz3			Spz3
SRX2600370_SRR5298183									mosquito_sporozoite	Tak-Ubon_Thailand_SEA	SpztThai19	Spz3			Spz3
SRX2600365_SRR5298178	0	4055	Muller19	5.6	4.7	0.9	4.4	90	mosquito_sporozoite	Tak-Ubon_Thailand_SEA	SpztThai19	Spz5			Spz5
SRX2600366_SRR5298179									mosquito_sporozoite	Tak-Ubon_Thailand_SEA	SpztThai19	Spz5			Spz5
SRX2600375_SRR5298188	1	15912	Muller19	47.8	39.6	8.2	16.6	35.6	mosquito_sporozoite	Tak-Ubon_Thailand_SEA	SpztThai19	Spz6			Spz6
SRX2600376_SRR5298189									mosquito_sporozoite	Tak-Ubon_Thailand_SEA	SpztThai19	Spz6			Spz6
SRX2600363_SRR5298176	0	48991	Muller19	62.4	38.6	23.8	18	19.6	mosquito_sporozoite	Tak-Ubon_Thailand_SEA	SpztThai19	Spz7			Spz7
SRX2600364_SRR5298177									mosquito_sporozoite	Tak-Ubon_Thailand_SEA	SpztThai19	Spz7			Spz7
SRX2600361_SRR5298174	0	33248	Muller19	38.2	26	12.2	13.5	48.3	mosquito_sporozoite	Tak-Ubon_Thailand_SEA	SpztThai19	Spz8			Spz8
SRX2600362_SRR5298175									mosquito_sporozoite	Tak-Ubon_Thailand_SEA	SpztThai19	Spz8			Spz8
SRX2600359_SRR5298172	0	43040	Muller19	46.7	32.1	14.6	15.2	38.1	mosquito_sporozoite	Tak-Ubon_Thailand_SEA	SpztThai19	Spz9			Spz9
SRX2600360_SRR5298173									mosquito_sporozoite	Tak-Ubon_Thailand_SEA	SpztThai19	Spz9			Spz9
